# Supplementary material
Source: publisher figshare collection journal article supplement (https://asha.figshare.com/articles/dataset/_/21514044)
Supplement: Supplementary file 1 [file 1]

Archive with 6 entries (6 files):
- S1_AJA-22-00079Lelic.pdf
- S2_AJA-22-00079Lelic.pdf
- S3_AJA-22-00079Lelic.pdf
- S4_AJA-22-00079Lelic.pdf
- S5_AJA-22-00079Lelic.pdf
- S6_AJA-22-00079Lelic.pdf
