# Supplementary material
Source: publisher figshare collection journal article supplement (https://asha.figshare.com/articles/dataset/_/21514044)
Supplement: Supplementary file 1 [file 1 › S1_AJA-22-00079Lelic.pdf]

# HEARLI-Q Listening Situations and Questions

This document contains the final Hearing Related Lifestyle Questionnaire (HEARLI-Q) in four languages: English, Danish, Swedish and German. The four tables representing the 23 listening situations in each language are followed by a table with the four questions for each listening situation.

## Contents

|                                                              |   |
|--------------------------------------------------------------|---|
| Listening Situations in English .....                        | 2 |
| Listening Situations (Lyttesituationer) in Danish.....       | 3 |
| Listening Situations (Lyssningssituationer) in Swedish ..... | 4 |
| Listening Situations (Hörsituationen) in German .....        | 5 |
| Questions for Each Listening Situation.....                  | 6 |

## Listening Situations in English

---

### Speech Communication – One Person

---

1. Conversation with **one person** in a **quiet environment** (for instance at home or in an office)
  2. Conversation with **one person** in a **noisy environment** (for instance at a restaurant)
  3. Conversation with **one person** in **transport** (for instance in a car or public transport)
  4. Conversation with **a child** in a **quiet environment** (for instance at home)
  5. Conversation with **a child** in a **noisy environment** (for instance at kindergarten)
  6. Conversation **with one person** in a place where there are **a lot of echoes** (for instance a church or a railway terminus building)
- 

### Speech Communication – Several People

---

7. Conversation with **several people** in a **quiet environment** (for instance at home or in an office)
  8. Conversation with **several people** in a **noisy environment** (for instance at a restaurant)
  9. Conversation with **several people** in **transport** (for instance in a car or public transport)
- 

### Speech Communication – Through Device

---

10. Conversation with **one or more people** using a **phone or some other communication device** (for instance a computer or mobile phone) in a **quiet room at home**
  11. Conversation with **one person** using a **mobile phone** while standing next to a **busy street**
- 

### Focused Listening – Live Sounds

---

12. Listening to **a lecture**
  13. Listening to **a live theater play**
  14. Listening to **a live concert** in a **noisy crowd of people**
- 

### Focused Listening – Through Media

---

15. Listening to **TV** in a **quiet room at home**
  16. Listening to **the radio or a podcast** in a **quiet room at home**
  17. Listening to **music at home**
  18. Listening to **the car stereo** in a **moving car**
- 

### Non-Specific - Monitoring

---

19. Monitoring sounds when **vacuum cleaning**
  20. Monitoring **traffic sounds** when walking on a **busy street**
- 

### Non-Specific – Passive Listening

---

21. **Relaxing** in a **quiet room at home** (for instance while reading or doing a crossword puzzle)
  22. Being a **car passenger** or on **public transport** “doing nothing” or reading
  23. Hearing **sounds of nature**
-

## Listening Situations (Lyttesituationer) in Danish

---

### Kommunikation med tale – En person

---

1. Samtale med **én person** i **stille omgivelser** (for eksempel derhjemme eller på et kontor)
2. Samtale med **én person** i **støjende omgivelser** (for eksempel på en restaurant)
3. Samtale med **én person** under **transport** (for eksempel i en bil eller i offentlig transport)
4. Samtale med **et barn** i **stille omgivelser** (for eksempel derhjemme)
5. Samtale med **et barn** i **støjende omgivelser** (for eksempel i børnehaven)
6. Samtale med **én person** et sted, hvor der er **meget ekko** (for eksempel i en kirke eller i stationsbygningen på en banegård)

---

### Kommunikation med tale – Flere personer

---

7. Samtale med **flere personer** i **stille omgivelser** (for eksempel derhjemme eller på et kontor)
8. Samtale med **flere personer** i **støjende omgivelser** (for eksempel på en restaurant)
9. Samtale med **flere personer** under **transport** (for eksempel i en bil eller i offentlig transport)

---

### Kommunikation med tale – Teknisk udstyr

---

10. Samtale med **én eller flere personer**, hvor du bruger **telefon** eller **andet kommunikationsudstyr** (for eksempel computer eller mobiltelefon) i et **stille rum derhjemme**
11. Samtale med **én person**, hvor du bruger **mobiltelefon** mens du står ved en **trafikeret gade**

---

### Lytte fokuseret – Uden mulighed for at påvirke lydkilden

---

12. Lytte til **et foredrag**
13. Lytte til **et teaterstykke på et teater**
14. Lytte til **en live koncert** i en **larm af mennesker**

---

### Lytte fokuseret – Med mulighed for at påvirke lydkilden

---

15. Lytte til **TV** i et **stille rum derhjemme**
16. Lytte til **radio** eller **podcast** i et **stille rum derhjemme**
17. Lytte til **musik derhjemme**
18. Lytte til **bilradio** i en **kørende bil**

---

### Uspecificeret - Være opmærksom på relevante lyde i omgivelserne

---

19. Være opmærksom på lyde **under støvsugning**
20. Være opmærksom på **trafiklyde**, når du går på en **trafikeret gade**

---

### Uspecificeret – Passiv lytning

---

21. **Afslapning** i et **stille rum derhjemme** (for eksempel ved at læse eller løse kryds og tværs)
  22. Være **passager i bil** eller i **offentlig transport** og lave ingenting eller læse
  23. Høre **naturens lyde**
-

## Listening Situations (Lyssningssituationer) in Swedish

---

### Talkommunikation – En person

---

1. Samtal med **en person** i en **tyst miljö** (t. ex. hemma eller på ett kontor)
  2. Samtal med **en person** i en **bullrig miljö** (t. ex. på en restaurang)
  3. Samtal med **en person** i ett **fordon** (t. ex. i en bil eller i kollektivtrafiken)
  4. Samtal med **ett barn** i en **tyst miljö** (t. ex. hemma)
  5. Samtal med **ett barn** i en **bullrig miljö** (t. ex. på en förskola)
  6. Samtal med **en person** på en plats där det **ekar mycket** (t. ex. i en kyrka eller i en stationsbyggnad)
- 

### Talkommunikation – Flera personer

---

7. Samtal med **flera personer** i en **tyst miljö** (t. ex. hemma eller på ett kontor)
  8. Samtal med **flera personer** i en **bullrig miljö** (t.ex. på en restaurang)
  9. Samtal med **flera personer** i ett **fordon** (t.ex. i en bil eller i kollektivtrafiken)
- 

### Talkommunikation – Via teknisk utrustning

---

10. Samtal med **en eller flera** personer när du använder **telefon eller annan kommunikationsutrustning** (t.ex. dator eller mobiltelefon) i ett **tyst rum hemma**
  11. Samtal med **en person** när du använder **mobiltelefon** vid en **trafikerad gata**
- 

### Fokuserat lyssnande – Utan möjlighet att påverka ljudkällan

---

12. Lyssna på **ett föredrag**
  13. Lyssna på **en föreställning på en teater**
  14. Lyssna på **en live-konsert** i en **stimmig grupp med människor**
- 

### Fokuserat lyssnande – Med möjlighet att påverka ljudkällan

---

15. Lyssna på **TV** i ett **tyst rum hemma**
  16. Lyssna på **radio** eller en **podcast** i ett **tyst rum hemma**
  17. Lyssna på **musik hemma**
  18. Lyssna på **bilstereon** i en **bil under färd**
- 

### Non-Specific - Vara uppmärksam på relevanta omgivningsljud

---

19. Vara medveten om ljud vid **dammsugning**
  20. Vara uppmärksam på **trafikljud** under en promenad vid en **trafikerad gata**
- 

### Non-Specific – Passivt lyssnande

---

21. **Koppla** av i ett **tyst rum hemma** (t. ex. när man läser en bok eller löser ett korsord)
  22. Vara **passagerare i en bil** eller i **kollektivtrafiken** utan att man gör något särskilt eller läser
  23. Höra **naturljud**
-

## Listening Situations (Hörsituationen) in German

---

### Sprachkommunikation – Einer Person

---

1. Gespräch mit **einer Person** in **leiser Umgebung** (z.B. zu Hause oder im Büro)
2. Gespräch mit **einer Person** in **geräuschvoller Umgebung** (z.B. im Restaurant)
3. Gespräch mit **einer Person** im **Auto** oder einem anderen **(öffentlichen) Verkehrsmittel**
4. Gespräch mit **einem Kind** in **leiser Umgebung** (z.B. zu Hause)
5. Gespräch mit **einem Kind** in **geräuschvoller Umgebung** (z.B. im Kindergarten)
6. Gespräch mit **einer Person** in einer Umgebung mit **viel Echo** (z.B. in einer Kirche oder Bahnhofshalle)

---

### Sprachkommunikation – Mehreren Personen

---

7. Gespräch mit **mehreren Personen** in **leiser Umgebung** (z.B. zu Hause oder im Büro)
8. Gespräch mit **mehreren Personen** in **geräuschvoller Umgebung** (z.B. im Restaurant)
9. Gespräch mit **mehreren Personen** im **Auto** oder einem anderen **(öffentlichen) Verkehrsmittel**

---

### Sprachkommunikation – Über ein Gerät

---

10. Gespräch mit **einer oder mehreren Personen** über **Telefon** oder ein **anderes Gerät** (z.B. Computer oder Mobiltelefon) in einem **leisen Raum zu Hause**
11. Gespräch mit **einer Person** über ein **Mobiltelefon** an einer **belebten Straße**

---

### Konzentriertes Zuhören – Schallereignissen zuhören, auf die man keinen Einfluss hat

---

12. **Einem Vortrag** zuhören
13. **Einer Vorstellung im Theater** zuhören
14. **Einem Livekonzert** in einem **lauten Publikum** zuhören

---

### Konzentriertes Zuhören – Einstellbaren Medien zuhören

---

15. **Fernsehen** in einem **leisen Raum zu Hause**
16. Dem **Radio** oder einem **Podcast** zu **Hause** zuhören
17. **Musikhören** zu **Hause**
18. Dem **Autoradio während der Fahrt** zuhören

---

### Unspezifisch - Wahrnehmung relevanter Geräusche

---

19. Wahrnehmung relevanter Geräusche beim **Staubsaugen**
20. Wahrnehmung relevanter Geräusche beim Spaziergang an einer **belebten Straße**

---

### Unspezifisch – Passives Hören

---

21. **Entspannen** in einem **leisen Raum zu Hause** (z.B. beim Lesen oder Kreuzworträtsel lösen)
  22. In einem **öffentlichen Verkehrsmittel** oder als **Beifahrer im Auto** „nichts tun“ oder lesen
  23. **Naturgeräusche** hören
-

## Questions for Each Listening Situation

The four questions asked for each of the listening situations are presented in the table below. The numbers in parenthesis indicate the number used in calculation of richness of auditory lifestyle, auditory demand, hearing difficulty and hearing aid satisfaction. An asterisk (\*) denotes answers that are not used during the calculation of the outcomes. If your technical setup allows for adaptive questions, the response option for “I am never in this situation” can be omitted in Importance, Difficulty and HA Satisfaction questions. When not including HA users, the question about HA satisfaction can be omitted. Abbreviations: ENG – English; DK – Danish; SWE – Swedish; GER – German.

| <b>Occurrence</b><br>ENG / DK / SWE / GER                                                                                                                      | <b>Importance</b><br>ENG / DK / SWE / GER                                                                                                                                                                                                              | <b>Difficulty</b><br>ENG / DK / SWE / GER                                                                                                                                                                                                | <b>HA Satisfaction</b><br>ENG / DK / SWE / GER                                                                                                                                                                                                               |
|----------------------------------------------------------------------------------------------------------------------------------------------------------------|--------------------------------------------------------------------------------------------------------------------------------------------------------------------------------------------------------------------------------------------------------|------------------------------------------------------------------------------------------------------------------------------------------------------------------------------------------------------------------------------------------|--------------------------------------------------------------------------------------------------------------------------------------------------------------------------------------------------------------------------------------------------------------|
| How often are you in this situation?<br>/ Hvor ofte er du i denne situation?<br>/ Hur ofta är du i denna situation? /<br>Wie oft sind Sie in dieser Situation? | How important is it for you to hear well in this situation? / Hvor vigtigt er det for dig at høre godt i denne situation? / Hur viktigt är det för dig att höra bra i denna situation? / Wie wichtig ist es für Sie, in dieser Situation gut zu hören? | How difficult is it for you to hear in this situation? / Hvor svært er det for dig at høre i denne situation? / Hur svårt är det för dig att höra/lyssna i denna situation? / Wie schwierig ist es für Sie in dieser Situation zu hören? | How satisfied are you with your hearing aids in this situation? / Hvor tilfreds er du med dine høreapparater i denne situation? / Hur nöjd är du med dina hörapparater i denna situation? / Wie zufrieden sind Sie in dieser Situation mit Ihren Hörgeräten? |
|                                                                                                                                                                |                                                                                                                                                                                                                                                        |                                                                                                                                                                                                                                          | I don't wear hearing aids in this situation / Jeg har ikke høreapparater på i denne situation / Jag använder inte hörapparater i denna situation / Ich nutze in dieser Situation meine Hörgeräte nicht *                                                     |
| Never / Aldrig / Aldrig / Niemals (0)                                                                                                                          | Not important / Ikke vigtigt / Inte alls viktigt / Überhaupt nicht wichtig (0)                                                                                                                                                                         | Not difficult / Ikke svært / Inte alls svårt / Überhaupt nicht schwierig (0)                                                                                                                                                             | Not satisfied / Ikke tilfreds / Inte alls nöjd / Überhaupt nicht zufrieden (1)                                                                                                                                                                               |
| A couple of times a year / Et par gange om året / Några gånger om året / Einige Male im Jahr (1)                                                               | Slightly important / Lidt vigtigt / Lite viktigt / Nicht sehr wichtig (1)                                                                                                                                                                              | Slightly difficult / Lidt svært / Lite svårt / Nicht sehr schwierig (1)                                                                                                                                                                  | Slightly satisfied / Lidt tilfreds / Lite nöjd / Nicht sehr zufrieden (2)                                                                                                                                                                                    |
| Monthly / Hver måned / Varje månad / Monatlich (2)                                                                                                             | Moderately important / Moderat vigtigt / Ganska viktigt / Einigermaßen wichtig (2)                                                                                                                                                                     | Moderately difficult / Moderat svært / Ganska svårt / Einigermaßen schwierig (2)                                                                                                                                                         | Moderately satisfied / Moderat tilfreds / Ganska nöjd / Einigermaßen zufrieden (3)                                                                                                                                                                           |
| Weekly / Hver uge / Varje vecka / Wöchentlich (3)                                                                                                              | Very important / Meget vigtigt / Mycket viktigt / Sehr wichtig (3)                                                                                                                                                                                     | Very difficult / Meget svært / Mycket svårt / Sehr schwierig (3)                                                                                                                                                                         | Very satisfied / Meget tilfreds / Mycket nöjd / Sehr zufrieden (4)                                                                                                                                                                                           |
| Daily / Hver dag / Dagligen / Täglich (4)                                                                                                                      | Extremely important / Yderst vigtigt / Oerhørt vigtigt / Äußerst wichtig (4)                                                                                                                                                                           | Extremely difficult / Yderst svært / Oerhørt svært / Äußerst schwierig (4)                                                                                                                                                               | Extremely satisfied / Yderst tilfreds / Oerhørt nöjd / Äußerst zufrieden (5)                                                                                                                                                                                 |
|                                                                                                                                                                | I am never in this situation / Jeg er aldrig i denne situation / Jag är aldrig i denna situation / Ich bin niemals in dieser Situation *                                                                                                               | I am never in this situation / Jeg er aldrig i denne situation / Jag är aldrig i denna situation / Ich bin niemals in dieser Situation *                                                                                                 | I am never in this situation / Jeg er aldrig i denne situation / Jag är aldrig i denna situation / Ich bin niemals in dieser Situation *                                                                                                                     |
