# Supplementary material
Source: publisher figshare collection journal article supplement (https://asha.figshare.com/articles/dataset/_/21514044)
Supplement: Supplementary file 1 [file 1 › S3_AJA-22-00079Lelic.pdf]

## Spørgeskema om Lyttesituationer i Hverdagen

### HEARLI-Q

Formålet med dette spørgeskema er at forstå, hvilken type lyttesituationer du møder i din hverdag og i hvilken grad du har problemer med at høre i disse situationer. Svar så ærligt du kan baseret på dine erfaringer.

#### 1. Samtale med én person i stille omgivelser (for eksempel derhjemme eller på et kontor)

*Hvor ofte er du i denne situation?*

☐

Aldrig \*

☐

Et par gange om året

☐

Hver måned

☐

Hver uge

☐

Hver dag

\* Hvis aldrig, så gå til den næste lyttesituation

*Hvor vigtigt er det for dig at høre godt i denne situation?*

☐

Ikke vigtigt

☐

Lidt vigtigt

☐

Moderat vigtigt

☐

Meget vigtigt

☐

Yderst vigtigt

*Hvor svært er det for dig at høre i denne situation?*

☐

Ikke svært

☐

Lidt svært

☐

Moderat svært

☐

Meget svært

☐

Yderst svært

*Hvor tilfreds er du med dine høreapparater i denne situation?*

☐

Jeg har ikke høreapparater på i denne situation

☐

Ikke tilfreds

☐

Lidt tilfreds

☐

Moderat tilfreds

☐

Meget tilfreds

☐

Yderst tilfreds

## 2. Samtale med én person i støjende omgivelser (for eksempel på en restaurant)

*Hvor ofte er du i denne situation?*

☐

Aldrig \*

☐

Et par gange om året

☐

Hver måned

☐

Hver uge

☐

Hver dag

\* Hvis aldrig, så gå til den næste lyttesituation

*Hvor vigtigt er det for dig at høre godt i denne situation?*

☐

Ikke vigtigt

☐

Lidt vigtigt

☐

Moderat vigtigt

☐

Meget vigtigt

☐

Yderst vigtigt

*Hvor svært er det for dig at høre i denne situation?*

☐

Ikke svært

☐

Lidt svært

☐

Moderat svært

☐

Meget svært

☐

Yderst svært

*Hvor tilfreds er du med dine høreapparater i denne situation?*

☐

Jeg har ikke høreapparater på i denne situation

☐

Ikke tilfreds

☐

Lidt tilfreds

☐

Moderat tilfreds

☐

Meget tilfreds

☐

Yderst tilfreds

## 3. Samtale med én person under transport (for eksempel i en bil eller i offentlig transport)

*Hvor ofte er du i denne situation?*

☐

Aldrig \*

☐

Et par gange om året

☐

Hver måned

☐

Hver uge

☐

Hver dag

\* Hvis aldrig, så gå til den næste lyttesituation

*Hvor vigtigt er det for dig at høre godt i denne situation?*

☐

Ikke vigtigt

☐

Lidt vigtigt

☐

Moderat vigtigt

☐

Meget vigtigt

☐

Yderst vigtigt

*Hvor svært er det for dig at høre i denne situation?*

☐

Ikke svært

☐

Lidt svært

☐

Moderat svært

☐

Meget svært

☐

Yderst svært

*Hvor tilfreds er du med dine høreapparater i denne situation?*

☐

Jeg har ikke høreapparater på i denne situation

☐

Ikke tilfreds

☐

Lidt tilfreds

☐

Moderat tilfreds

☐

Meget tilfreds

☐

Yderst tilfreds

#### 4. Samtale med et barn i stille omgivelser (for eksempel derhjemme)

*Hvor ofte er du i denne situation?*

☐

Aldrig \*

☐

Et par gange om året

☐

Hver måned

☐

Hver uge

☐

Hver dag

\* Hvis aldrig, så gå til den næste lyttesituation

*Hvor vigtigt er det for dig at høre godt i denne situation?*

☐

Ikke vigtigt

☐

Lidt vigtigt

☐

Moderat vigtigt

☐

Meget vigtigt

☐

Yderst vigtigt

*Hvor svært er det for dig at høre i denne situation?*

☐

Ikke svært

☐

Lidt svært

☐

Moderat svært

☐

Meget svært

☐

Yderst svært

*Hvor tilfreds er du med dine høreapparater i denne situation?*

☐

Jeg har ikke høreapparater på i denne situation

☐

Ikke tilfreds

☐

Lidt tilfreds

☐

Moderat tilfreds

☐

Meget tilfreds

☐

Yderst tilfreds

#### 5. Samtale med et barn i støjende omgivelser (for eksempel i børnehaven)

*Hvor ofte er du i denne situation?*

☐

Aldrig \*

☐

Et par gange om året

☐

Hver måned

☐

Hver uge

☐

Hver dag

\* Hvis aldrig, så gå til den næste lyttesituation

*Hvor vigtigt er det for dig at høre godt i denne situation?*

☐

Ikke vigtigt

☐

Lidt vigtigt

☐

Moderat vigtigt

☐

Meget vigtigt

☐

Yderst vigtigt

*Hvor svært er det for dig at høre i denne situation?*

☐

Ikke svært

☐

Lidt svært

☐

Moderat svært

☐

Meget svært

☐

Yderst svært

*Hvor tilfreds er du med dine høreapparater i denne situation?*

☐

Jeg har ikke høreapparater på i denne situation

☐

Ikke tilfreds

☐

Lidt tilfreds

☐

Moderat tilfreds

☐

Meget tilfreds

☐

Yderst tilfreds

**6. Samtale med én person et sted, hvor der er meget ekko (for eksempel i en kirke eller i stationsbygningen på en banegård)**

*Hvor ofte er du i denne situation?*

☐

Aldrig\*

☐

Et par gange om året

☐

Hver måned

☐

Hver uge

☐

Hver dag

\* Hvis aldrig, så gå til den næste lyttesituation

*Hvor vigtigt er det for dig at høre godt i denne situation?*

☐

Ikke vigtigt

☐

Lidt vigtigt

☐

Moderat vigtigt

☐

Meget vigtigt

☐

Yderst vigtigt

*Hvor svært er det for dig at høre i denne situation?*

☐

Ikke svært

☐

Lidt svært

☐

Moderat svært

☐

Meget svært

☐

Yderst svært

*Hvor tilfreds er du med dine høreapparater i denne situation?*

☐

Jeg har ikke høreapparater på i denne situation

☐

Ikke tilfreds

☐

Lidt tilfreds

☐

Moderat tilfreds

☐

Meget tilfreds

☐

Yderst tilfreds

**7. Samtale med flere personer i stille omgivelser (for eksempel derhjemme eller på et kontor)**

*Hvor ofte er du i denne situation?*

☐

Aldrig\*

☐

Et par gange om året

☐

Hver måned

☐

Hver uge

☐

Hver dag

\* Hvis aldrig, så gå til den næste lyttesituation

*Hvor vigtigt er det for dig at høre godt i denne situation?*

☐

Ikke vigtigt

☐

Lidt vigtigt

☐

Moderat vigtigt

☐

Meget vigtigt

☐

Yderst vigtigt

*Hvor svært er det for dig at høre i denne situation?*

☐

Ikke svært

☐

Lidt svært

☐

Moderat svært

☐

Meget svært

☐

Yderst svært

*Hvor tilfreds er du med dine høreapparater i denne situation?*

☐

Jeg har ikke høreapparater på i denne situation

☐

Ikke tilfreds

☐

Lidt tilfreds

☐

Moderat tilfreds

☐

Meget tilfreds

☐

Yderst tilfreds

## 8. Samtale med flere personer i støjende omgivelser (for eksempel på en restaurant)

*Hvor ofte er du i denne situation?*

☐

Aldrig \*

☐

Et par gange om året

☐

Hver måned

☐

Hver uge

☐

Hver dag

\* Hvis aldrig, så gå til den næste lyttesituation

*Hvor vigtigt er det for dig at høre godt i denne situation?*

☐

Ikke vigtigt

☐

Lidt vigtigt

☐

Moderat vigtigt

☐

Meget vigtigt

☐

Yderst vigtigt

*Hvor svært er det for dig at høre i denne situation?*

☐

Ikke svært

☐

Lidt svært

☐

Moderat svært

☐

Meget svært

☐

Yderst svært

*Hvor tilfreds er du med dine høreapparater i denne situation?*

☐

Jeg har ikke høreapparater på i denne situation

☐

Ikke tilfreds

☐

Lidt tilfreds

☐

Moderat tilfreds

☐

Meget tilfreds

☐

Yderst tilfreds

## 9. Samtale med flere personer under transport (for eksempel i en bil eller i offentlig transport)

*Hvor ofte er du i denne situation?*

☐

Aldrig \*

☐

Et par gange om året

☐

Hver måned

☐

Hver uge

☐

Hver dag

\* Hvis aldrig, så gå til den næste lyttesituation

*Hvor vigtigt er det for dig at høre godt i denne situation?*

☐

Ikke vigtigt

☐

Lidt vigtigt

☐

Moderat vigtigt

☐

Meget vigtigt

☐

Yderst vigtigt

*Hvor svært er det for dig at høre i denne situation?*

☐

Ikke svært

☐

Lidt svært

☐

Moderat svært

☐

Meget svært

☐

Yderst svært

*Hvor tilfreds er du med dine høreapparater i denne situation?*

☐

Jeg har ikke høreapparater på i denne situation

☐

Ikke tilfreds

☐

Lidt tilfreds

☐

Moderat tilfreds

☐

Meget tilfreds

☐

Yderst tilfreds

**10. Samtale med én eller flere personer, hvor du bruger telefon eller andet kommunikationsudstyr (for eksempel computer eller mobiltelefon) i et stille rum derhjemme**

*Hvor ofte er du i denne situation?*

☐

Aldrig\*

☐

Et par gange om året

☐

Hver måned

☐

Hver uge

☐

Hver dag

\* Hvis aldrig, så gå til den næste lyttesituation

*Hvor vigtigt er det for dig at høre godt i denne situation?*

☐

Ikke vigtigt

☐

Lidt vigtigt

☐

Moderat vigtigt

☐

Meget vigtigt

☐

Yderst vigtigt

*Hvor svært er det for dig at høre i denne situation?*

☐

Ikke svært

☐

Lidt svært

☐

Moderat svært

☐

Meget svært

☐

Yderst svært

*Hvor tilfreds er du med dine høreapparater i denne situation?*

☐

Jeg har ikke høreapparater på i denne situation

☐

Ikke tilfreds

☐

Lidt tilfreds

☐

Moderat tilfreds

☐

Meget tilfreds

☐

Yderst tilfreds

**11. Samtale med én person, hvor du bruger mobiltelefon mens du står ved en trafikeret gade**

*Hvor ofte er du i denne situation?*

☐

Aldrig\*

☐

Et par gange om året

☐

Hver måned

☐

Hver uge

☐

Hver dag

\* Hvis aldrig, så gå til den næste lyttesituation

*Hvor vigtigt er det for dig at høre godt i denne situation?*

☐

Ikke vigtigt

☐

Lidt vigtigt

☐

Moderat vigtigt

☐

Meget vigtigt

☐

Yderst vigtigt

*Hvor svært er det for dig at høre i denne situation?*

☐

Ikke svært

☐

Lidt svært

☐

Moderat svært

☐

Meget svært

☐

Yderst svært

*Hvor tilfreds er du med dine høreapparater i denne situation?*

☐

Jeg har ikke høreapparater på i denne situation

☐

Ikke tilfreds

☐

Lidt tilfreds

☐

Moderat tilfreds

☐

Meget tilfreds

☐

Yderst tilfreds

## 12. Lytte til et foredrag

*Hvor ofte er du i denne situation?*

☐

Aldrig \*

☐

Et par gange om året

☐

Hver måned

☐

Hver uge

☐

Hver dag

\* Hvis aldrig, så gå til den næste lyttesituation

*Hvor vigtigt er det for dig at høre godt i denne situation?*

☐

Ikke vigtigt

☐

Lidt vigtigt

☐

Moderat vigtigt

☐

Meget vigtigt

☐

Yderst vigtigt

*Hvor svært er det for dig at høre i denne situation?*

☐

Ikke svært

☐

Lidt svært

☐

Moderat svært

☐

Meget svært

☐

Yderst svært

*Hvor tilfreds er du med dine høreapparater i denne situation?*

☐

Jeg har ikke høreapparater på i denne situation

☐

Ikke tilfreds

☐

Lidt tilfreds

☐

Moderat tilfreds

☐

Meget tilfreds

☐

Yderst tilfreds

## 13. Lytte til et teaterstykke på et teater

*Hvor ofte er du i denne situation?*

☐

Aldrig \*

☐

Et par gange om året

☐

Hver måned

☐

Hver uge

☐

Hver dag

\* Hvis aldrig, så gå til den næste lyttesituation

*Hvor vigtigt er det for dig at høre godt i denne situation?*

☐

Ikke vigtigt

☐

Lidt vigtigt

☐

Moderat vigtigt

☐

Meget vigtigt

☐

Yderst vigtigt

*Hvor svært er det for dig at høre i denne situation?*

☐

Ikke svært

☐

Lidt svært

☐

Moderat svært

☐

Meget svært

☐

Yderst svært

*Hvor tilfreds er du med dine høreapparater i denne situation?*

☐

Jeg har ikke høreapparater på i denne situation

☐

Ikke tilfreds

☐

Lidt tilfreds

☐

Moderat tilfreds

☐

Meget tilfreds

☐

Yderst tilfreds

#### 14. Lytte til en live koncert i en larm af mennesker

*Hvor ofte er du i denne situation?*

☐

Aldrig \*

☐

Et par gange om året

☐

Hver måned

☐

Hver uge

☐

Hver dag

\* Hvis aldrig, så gå til den næste lyttesituation

*Hvor vigtigt er det for dig at høre godt i denne situation?*

☐

Ikke vigtigt

☐

Lidt vigtigt

☐

Moderat vigtigt

☐

Meget vigtigt

☐

Yderst vigtigt

*Hvor svært er det for dig at høre i denne situation?*

☐

Ikke svært

☐

Lidt svært

☐

Moderat svært

☐

Meget svært

☐

Yderst svært

*Hvor tilfreds er du med dine høreapparater i denne situation?*

☐

Jeg har ikke høreapparater på i denne situation

☐

Ikke tilfreds

☐

Lidt tilfreds

☐

Moderat tilfreds

☐

Meget tilfreds

☐

Yderst tilfreds

#### 15. Lytte til TV i et stille rum derhjemme

*Hvor ofte er du i denne situation?*

☐

Aldrig \*

☐

Et par gange om året

☐

Hver måned

☐

Hver uge

☐

Hver dag

\* Hvis aldrig, så gå til den næste lyttesituation

*Hvor vigtigt er det for dig at høre godt i denne situation?*

☐

Ikke vigtigt

☐

Lidt vigtigt

☐

Moderat vigtigt

☐

Meget vigtigt

☐

Yderst vigtigt

*Hvor svært er det for dig at høre i denne situation?*

☐

Ikke svært

☐

Lidt svært

☐

Moderat svært

☐

Meget svært

☐

Yderst svært

*Hvor tilfreds er du med dine høreapparater i denne situation?*

☐

Jeg har ikke høreapparater på i denne situation

☐

Ikke tilfreds

☐

Lidt tilfreds

☐

Moderat tilfreds

☐

Meget tilfreds

☐

Yderst tilfreds

## 16. Lytte til radio eller podcast i et stille rum derhjemme

*Hvor ofte er du i denne situation?*

☐

Aldrig \*

☐

Et par gange om året

☐

Hver måned

☐

Hver uge

☐

Hver dag

\* Hvis aldrig, så gå til den næste lyttesituation

*Hvor vigtigt er det for dig at høre godt i denne situation?*

☐

Ikke vigtigt

☐

Lidt vigtigt

☐

Moderat vigtigt

☐

Meget vigtigt

☐

Yderst vigtigt

*Hvor svært er det for dig at høre i denne situation?*

☐

Ikke svært

☐

Lidt svært

☐

Moderat svært

☐

Meget svært

☐

Yderst svært

*Hvor tilfreds er du med dine høreapparater i denne situation?*

☐

Jeg har ikke høreapparater på i denne situation

☐

Ikke tilfreds

☐

Lidt tilfreds

☐

Moderat tilfreds

☐

Meget tilfreds

☐

Yderst tilfreds

## 17. Lytte til musik derhjemme

*Hvor ofte er du i denne situation?*

☐

Aldrig \*

☐

Et par gange om året

☐

Hver måned

☐

Hver uge

☐

Hver dag

\* Hvis aldrig, så gå til den næste lyttesituation

*Hvor vigtigt er det for dig at høre godt i denne situation?*

☐

Ikke vigtigt

☐

Lidt vigtigt

☐

Moderat vigtigt

☐

Meget vigtigt

☐

Yderst vigtigt

*Hvor svært er det for dig at høre i denne situation?*

☐

Ikke svært

☐

Lidt svært

☐

Moderat svært

☐

Meget svært

☐

Yderst svært

*Hvor tilfreds er du med dine høreapparater i denne situation?*

☐

Jeg har ikke høreapparater på i denne situation

☐

Ikke tilfreds

☐

Lidt tilfreds

☐

Moderat tilfreds

☐

Meget tilfreds

☐

Yderst tilfreds

## 18. Lytte til bilradio i en kørende bil

*Hvor ofte er du i denne situation?*

☐

Aldrig \*

☐

Et par gange om året

☐

Hver måned

☐

Hver uge

☐

Hver dag

\* Hvis aldrig, så gå til den næste lyttesituation

*Hvor vigtigt er det for dig at høre godt i denne situation?*

☐

Ikke vigtigt

☐

Lidt vigtigt

☐

Moderat vigtigt

☐

Meget vigtigt

☐

Yderst vigtigt

*Hvor svært er det for dig at høre i denne situation?*

☐

Ikke svært

☐

Lidt svært

☐

Moderat svært

☐

Meget svært

☐

Yderst svært

*Hvor tilfreds er du med dine høreapparater i denne situation?*

☐

Jeg har ikke høreapparater på i denne situation

☐

Ikke tilfreds

☐

Lidt tilfreds

☐

Moderat tilfreds

☐

Meget tilfreds

☐

Yderst tilfreds

## 19. Være opmærksom på lyde under støvsugning

*Hvor ofte er du i denne situation?*

☐

Aldrig \*

☐

Et par gange om året

☐

Hver måned

☐

Hver uge

☐

Hver dag

\* Hvis aldrig, så gå til den næste lyttesituation

*Hvor vigtigt er det for dig at høre godt i denne situation?*

☐

Ikke vigtigt

☐

Lidt vigtigt

☐

Moderat vigtigt

☐

Meget vigtigt

☐

Yderst vigtigt

*Hvor svært er det for dig at høre i denne situation?*

☐

Ikke svært

☐

Lidt svært

☐

Moderat svært

☐

Meget svært

☐

Yderst svært

*Hvor tilfreds er du med dine høreapparater i denne situation?*

☐

Jeg har ikke høreapparater på i denne situation

☐

Ikke tilfreds

☐

Lidt tilfreds

☐

Moderat tilfreds

☐

Meget tilfreds

☐

Yderst tilfreds

## 20. Være opmærksom på trafiklyde, når du går på en trafikeret gade

*Hvor ofte er du i denne situation?*

☐

Aldrig \*

☐

Et par gange om året

☐

Hver måned

☐

Hver uge

☐

Hver dag

\* Hvis aldrig, så gå til den næste lyttesituation

*Hvor vigtigt er det for dig at høre godt i denne situation?*

☐

Ikke vigtigt

☐

Lidt vigtigt

☐

Moderat vigtigt

☐

Meget vigtigt

☐

Yderst vigtigt

*Hvor svært er det for dig at høre i denne situation?*

☐

Ikke svært

☐

Lidt svært

☐

Moderat svært

☐

Meget svært

☐

Yderst svært

*Hvor tilfreds er du med dine høreapparater i denne situation?*

☐

Jeg har ikke høreapparater på i denne situation

☐

Ikke tilfreds

☐

Lidt tilfreds

☐

Moderat tilfreds

☐

Meget tilfreds

☐

Yderst tilfreds

## 21. Afslapning i et stille rum derhjemme (for eksempel ved at læse eller løse kryds og tværs)

*Hvor ofte er du i denne situation?*

☐

Aldrig \*

☐

Et par gange om året

☐

Hver måned

☐

Hver uge

☐

Hver dag

\* Hvis aldrig, så gå til den næste lyttesituation

*Hvor vigtigt er det for dig at høre godt i denne situation?*

☐

Ikke vigtigt

☐

Lidt vigtigt

☐

Moderat vigtigt

☐

Meget vigtigt

☐

Yderst vigtigt

*Hvor svært er det for dig at høre i denne situation?*

☐

Ikke svært

☐

Lidt svært

☐

Moderat svært

☐

Meget svært

☐

Yderst svært

*Hvor tilfreds er du med dine høreapparater i denne situation?*

☐

Jeg har ikke høreapparater på i denne situation

☐

Ikke tilfreds

☐

Lidt tilfreds

☐

Moderat tilfreds

☐

Meget tilfreds

☐

Yderst tilfreds

## 22. Være passager i bil eller i offentlig transport og lave ingenting eller læse

*Hvor ofte er du i denne situation?*

☐

Aldrig \*

☐

Et par gange om året

☐

Hver måned

☐

Hver uge

☐

Hver dag

\* Hvis aldrig, så gå til den næste lyttesituation

*Hvor vigtigt er det for dig at høre godt i denne situation?*

☐

Ikke vigtigt

☐

Lidt vigtigt

☐

Moderat vigtigt

☐

Meget vigtigt

☐

Yderst vigtigt

*Hvor svært er det for dig at høre i denne situation?*

☐

Ikke svært

☐

Lidt svært

☐

Moderat svært

☐

Meget svært

☐

Yderst svært

*Hvor tilfreds er du med dine høreapparater i denne situation?*

☐

Jeg har ikke høreapparater på i denne situation

☐

Ikke tilfreds

☐

Lidt tilfreds

☐

Moderat tilfreds

☐

Meget tilfreds

☐

Yderst tilfreds

## 23. Høre naturens lyde

*Hvor ofte er du i denne situation?*

☐

Aldrig \*

☐

Et par gange om året

☐

Hver måned

☐

Hver uge

☐

Hver dag

\* Hvis aldrig, så gå til den næste lyttesituation

*Hvor vigtigt er det for dig at høre godt i denne situation?*

☐

Ikke vigtigt

☐

Lidt vigtigt

☐

Moderat vigtigt

☐

Meget vigtigt

☐

Yderst vigtigt

*Hvor svært er det for dig at høre i denne situation?*

☐

Ikke svært

☐

Lidt svært

☐

Moderat svært

☐

Meget svært

☐

Yderst svært

*Hvor tilfreds er du med dine høreapparater i denne situation?*

☐

Jeg har ikke høreapparater på i denne situation

☐

Ikke tilfreds

☐

Lidt tilfreds

☐

Moderat tilfreds

☐

Meget tilfreds

☐

Yderst tilfreds
