# Supplementary material
Source: publisher figshare collection journal article supplement (https://asha.figshare.com/articles/dataset/_/21514044)
Supplement: Supplementary file 1 [file 1 › S4_AJA-22-00079Lelic.pdf]

## Fragebogen zum Hörbezogenen Lebensstil HEARLI-Q

Das Ziel dieses Fragebogens ist es, herauszufinden, welche Hörsituationen Sie in ihrem Alltag erleben und inwieweit Sie in diesen Situationen Schwierigkeiten haben zu hören. Bitte beantworten Sie den Fragebogen auf der Grundlage Ihrer Erfahrungen so ehrlich wie möglich.

### 1. Gespräch mit einer Person in leiser Umgebung (z.B. zu Hause oder im Büro)

*Wie oft sind Sie in dieser Situation?*

☐

Niemals \*

☐

Einige Male im Jahr

☐

Monatlich

☐

Wöchentlich

☐

Täglich

\* Falls niemals, gehe direkt zu nächsten Hörsituation

*Wie wichtig ist es für Sie, in dieser Situation gut zu hören?*

☐

Überhaupt nicht wichtig

☐

Nicht sehr wichtig

☐

Einigermaßen wichtig

☐

Sehr wichtig

☐

Äußerst wichtig

*Wie schwierig ist es für Sie in dieser Situation zu hören?*

☐

Überhaupt nicht schwierig

☐

Nicht sehr schwierig

☐

Einigermaßen schwierig

☐

Sehr schwierig

☐

Äußerst schwierig

*Wie zufrieden sind Sie in dieser Situation mit Ihren Hörgeräten?*

☐

Ich nutze in dieser Situation meine Hörgeräte nicht

☐

Überhaupt nicht zufrieden

☐

Nicht sehr zufrieden

☐

Einigermaßen zufrieden

☐

Sehr zufrieden

☐

Äußerst zufrieden

## 2. Gespräch mit einer Person in geräuschvoller Umgebung (z.B. im Restaurant)

*Wie oft sind Sie in dieser Situation?*

☐

Niemals \*

☐

Einige Male im Jahr

☐

Monatlich

☐

Wöchentlich

☐

Täglich

\* Falls niemals, gehe direkt zu nächsten Hörsituation

*Wie wichtig ist es für Sie, in dieser Situation gut zu hören?*

☐

Überhaupt nicht wichtig

☐

Nicht sehr wichtig

☐

Einigermaßen wichtig

☐

Sehr wichtig

☐

Äußerst wichtig

*Wie schwierig ist es für Sie in dieser Situation zu hören?*

☐

Überhaupt nicht schwierig

☐

Nicht sehr schwierig

☐

Einigermaßen schwierig

☐

Sehr schwierig

☐

Äußerst schwierig

*Wie zufrieden sind Sie in dieser Situation mit Ihren Hörgeräten?*

☐

Ich nutze in dieser Situation meine Hörgeräte nicht

☐

Überhaupt nicht zufrieden

☐

Nicht sehr zufrieden

☐

Einigermaßen zufrieden

☐

Sehr zufrieden

☐

Äußerst zufrieden

## 3. Gespräch mit einer Person im Auto oder einem anderen (öffentlichen) Verkehrsmittel

*Wie oft sind Sie in dieser Situation?*

☐

Niemals \*

☐

Einige Male im Jahr

☐

Monatlich

☐

Wöchentlich

☐

Täglich

\* Falls niemals, gehe direkt zu nächsten Hörsituation

*Wie wichtig ist es für Sie, in dieser Situation gut zu hören?*

☐

Überhaupt nicht wichtig

☐

Nicht sehr wichtig

☐

Einigermaßen wichtig

☐

Sehr wichtig

☐

Äußerst wichtig

*Wie schwierig ist es für Sie in dieser Situation zu hören?*

☐

Überhaupt nicht schwierig

☐

Nicht sehr schwierig

☐

Einigermaßen schwierig

☐

Sehr schwierig

☐

Äußerst schwierig

*Wie zufrieden sind Sie in dieser Situation mit Ihren Hörgeräten?*

☐

Ich nutze in dieser Situation meine Hörgeräte nicht

☐

Überhaupt nicht zufrieden

☐

Nicht sehr zufrieden

☐

Einigermaßen zufrieden

☐

Sehr zufrieden

☐

Äußerst zufrieden

#### 4. Gespräch mit einem Kind in leiser Umgebung (z.B. zu Hause)

*Wie oft sind Sie in dieser Situation?*

☐

Niemals \*

☐

Einige Male im Jahr

☐

Monatlich

☐

Wöchentlich

☐

Täglich

\* Falls niemals, gehe direkt zu nächsten Hörsituation

*Wie wichtig ist es für Sie, in dieser Situation gut zu hören?*

☐

Überhaupt nicht wichtig

☐

Nicht sehr wichtig

☐

Einigermaßen wichtig

☐

Sehr wichtig

☐

Äußerst wichtig

*Wie schwierig ist es für Sie in dieser Situation zu hören?*

☐

Überhaupt nicht schwierig

☐

Nicht sehr schwierig

☐

Einigermaßen schwierig

☐

Sehr schwierig

☐

Äußerst schwierig

*Wie zufrieden sind Sie in dieser Situation mit Ihren Hörgeräten?*

☐

Ich nutze in dieser Situation meine Hörgeräte nicht

☐

Überhaupt nicht zufrieden

☐

Nicht sehr zufrieden

☐

Einigermaßen zufrieden

☐

Sehr zufrieden

☐

Äußerst zufrieden

#### 5. Gespräch mit einem Kind in geräuschvoller Umgebung (z.B. im Kindergarten)

*Wie oft sind Sie in dieser Situation?*

☐

Niemals \*

☐

Einige Male im Jahr

☐

Monatlich

☐

Wöchentlich

☐

Täglich

\* Falls niemals, gehe direkt zu nächsten Hörsituation

*Wie wichtig ist es für Sie, in dieser Situation gut zu hören?*

☐

Überhaupt nicht wichtig

☐

Nicht sehr wichtig

☐

Einigermaßen wichtig

☐

Sehr wichtig

☐

Äußerst wichtig

*Wie schwierig ist es für Sie in dieser Situation zu hören?*

☐

Überhaupt nicht schwierig

☐

Nicht sehr schwierig

☐

Einigermaßen schwierig

☐

Sehr schwierig

☐

Äußerst schwierig

*Wie zufrieden sind Sie in dieser Situation mit Ihren Hörgeräten?*

☐

Ich nutze in dieser Situation meine Hörgeräte nicht

☐

Überhaupt nicht zufrieden

☐

Nicht sehr zufrieden

☐

Einigermaßen zufrieden

☐

Sehr zufrieden

☐

Äußerst zufrieden

## 6. Gespräch mit einer Person in einer Umgebung mit viel Echo (z.B. in einer Kirche oder Bahnhofshalle)

Wie oft sind Sie in dieser Situation?

☐

Niemals \*

☐

Einige Male im Jahr

☐

Monatlich

☐

Wöchentlich

☐

Täglich

\* Falls niemals, gehe direkt zu nächsten Hörsituation

Wie wichtig ist es für Sie, in dieser Situation gut zu hören?

☐

Überhaupt nicht wichtig

☐

Nicht sehr wichtig

☐

Einigermaßen wichtig

☐

Sehr wichtig

☐

Äußerst wichtig

Wie schwierig ist es für Sie in dieser Situation zu hören?

☐

Überhaupt nicht schwierig

☐

Nicht sehr schwierig

☐

Einigermaßen schwierig

☐

Sehr schwierig

☐

Äußerst schwierig

Wie zufrieden sind Sie in dieser Situation mit Ihren Hörgeräten?

☐

Ich nutze in dieser Situation meine Hörgeräte nicht

☐

Überhaupt nicht zufrieden

☐

Nicht sehr zufrieden

☐

Einigermaßen zufrieden

☐

Sehr zufrieden

☐

Äußerst zufrieden

## 7. Gespräch mit mehreren Personen in leiser Umgebung (z.B. zu Hause oder im Büro)

Wie oft sind Sie in dieser Situation?

☐

Niemals \*

☐

Einige Male im Jahr

☐

Monatlich

☐

Wöchentlich

☐

Täglich

\* Falls niemals, gehe direkt zu nächsten Hörsituation

Wie wichtig ist es für Sie, in dieser Situation gut zu hören?

☐

Überhaupt nicht wichtig

☐

Nicht sehr wichtig

☐

Einigermaßen wichtig

☐

Sehr wichtig

☐

Äußerst wichtig

Wie schwierig ist es für Sie in dieser Situation zu hören?

☐

Überhaupt nicht schwierig

☐

Nicht sehr schwierig

☐

Einigermaßen schwierig

☐

Sehr schwierig

☐

Äußerst schwierig

Wie zufrieden sind Sie in dieser Situation mit Ihren Hörgeräten?

☐

Ich nutze in dieser Situation meine Hörgeräte nicht

☐

Überhaupt nicht zufrieden

☐

Nicht sehr zufrieden

☐

Einigermaßen zufrieden

☐

Sehr zufrieden

☐

Äußerst zufrieden

## 8. Gespräch mit mehreren Personen in geräuschvoller Umgebung (z.B. im Restaurant)

*Wie oft sind Sie in dieser Situation?*

☐

Niemals \*

☐

Einige Male im Jahr

☐

Monatlich

☐

Wöchentlich

☐

Täglich

\* Falls niemals, gehe direkt zu nächsten Hörsituation

*Wie wichtig ist es für Sie, in dieser Situation gut zu hören?*

☐

Überhaupt nicht wichtig

☐

Nicht sehr wichtig

☐

Einigermaßen wichtig

☐

Sehr wichtig

☐

Äußerst wichtig

*Wie schwierig ist es für Sie in dieser Situation zu hören?*

☐

Überhaupt nicht schwierig

☐

Nicht sehr schwierig

☐

Einigermaßen schwierig

☐

Sehr schwierig

☐

Äußerst schwierig

*Wie zufrieden sind Sie in dieser Situation mit Ihren Hörgeräten?*

☐

Ich nutze in dieser Situation meine Hörgeräte nicht

☐

Überhaupt nicht zufrieden

☐

Nicht sehr zufrieden

☐

Einigermaßen zufrieden

☐

Sehr zufrieden

☐

Äußerst zufrieden

## 9. Gespräch mit mehreren Personen im Auto oder einem anderen (öffentlichen) Verkehrsmittel

*Wie oft sind Sie in dieser Situation?*

☐

Niemals \*

☐

Einige Male im Jahr

☐

Monatlich

☐

Wöchentlich

☐

Täglich

\* Falls niemals, gehe direkt zu nächsten Hörsituation

*Wie wichtig ist es für Sie, in dieser Situation gut zu hören?*

☐

Überhaupt nicht wichtig

☐

Nicht sehr wichtig

☐

Einigermaßen wichtig

☐

Sehr wichtig

☐

Äußerst wichtig

*Wie schwierig ist es für Sie in dieser Situation zu hören?*

☐

Überhaupt nicht schwierig

☐

Nicht sehr schwierig

☐

Einigermaßen schwierig

☐

Sehr schwierig

☐

Äußerst schwierig

*Wie zufrieden sind Sie in dieser Situation mit Ihren Hörgeräten?*

☐

Ich nutze in dieser Situation meine Hörgeräte nicht

☐

Überhaupt nicht zufrieden

☐

Nicht sehr zufrieden

☐

Einigermaßen zufrieden

☐

Sehr zufrieden

☐

Äußerst zufrieden

**10. Gespräch mit einer oder mehreren Personen über Telefon oder ein anderes Gerät  
(z.B. Computer oder Mobiltelefon) in einem leisen Raum zu Hause**

*Wie oft sind Sie in dieser Situation?*

☐

Niemals \*

☐

Einige Male im Jahr

☐

Monatlich

☐

Wöchentlich

☐

Täglich

\* Falls niemals, gehe direkt zu nächsten Hörsituation

*Wie wichtig ist es für Sie, in dieser Situation gut zu hören?*

☐

Überhaupt nicht wichtig

☐

Nicht sehr wichtig

☐

Einigermaßen wichtig

☐

Sehr wichtig

☐

Äußerst wichtig

*Wie schwierig ist es für Sie in dieser Situation zu hören?*

☐

Überhaupt nicht schwierig

☐

Nicht sehr schwierig

☐

Einigermaßen schwierig

☐

Sehr schwierig

☐

Äußerst schwierig

*Wie zufrieden sind Sie in dieser Situation mit Ihren Hörgeräten?*

☐

Ich nutze in dieser Situation meine Hörgeräte nicht

☐

Überhaupt nicht zufrieden

☐

Nicht sehr zufrieden

☐

Einigermaßen zufrieden

☐

Sehr zufrieden

☐

Äußerst zufrieden

**11. Gespräch mit einer Person über ein Mobiltelefon an einer belebten Straße**

*Wie oft sind Sie in dieser Situation?*

☐

Niemals \*

☐

Einige Male im Jahr

☐

Monatlich

☐

Wöchentlich

☐

Täglich

\* Falls niemals, gehe direkt zu nächsten Hörsituation

*Wie wichtig ist es für Sie, in dieser Situation gut zu hören?*

☐

Überhaupt nicht wichtig

☐

Nicht sehr wichtig

☐

Einigermaßen wichtig

☐

Sehr wichtig

☐

Äußerst wichtig

*Wie schwierig ist es für Sie in dieser Situation zu hören?*

☐

Überhaupt nicht schwierig

☐

Nicht sehr schwierig

☐

Einigermaßen schwierig

☐

Sehr schwierig

☐

Äußerst schwierig

*Wie zufrieden sind Sie in dieser Situation mit Ihren Hörgeräten?*

☐

Ich nutze in dieser Situation meine Hörgeräte nicht

☐

Überhaupt nicht zufrieden

☐

Nicht sehr zufrieden

☐

Einigermaßen zufrieden

☐

Sehr zufrieden

☐

Äußerst zufrieden

## 12. Einem Vortrag zuhören

*Wie oft sind Sie in dieser Situation?*

☐

Niemals \*

☐

Einige Male im Jahr

☐

Monatlich

☐

Wöchentlich

☐

Täglich

\* Falls niemals, gehe direkt zu nächsten Hörsituation

*Wie wichtig ist es für Sie, in dieser Situation gut zu hören?*

☐

Überhaupt nicht wichtig

☐

Nicht sehr wichtig

☐

Einigermaßen wichtig

☐

Sehr wichtig

☐

Äußerst wichtig

*Wie schwierig ist es für Sie in dieser Situation zu hören?*

☐

Überhaupt nicht schwierig

☐

Nicht sehr schwierig

☐

Einigermaßen schwierig

☐

Sehr schwierig

☐

Äußerst schwierig

*Wie zufrieden sind Sie in dieser Situation mit Ihren Hörgeräten?*

☐

Ich nutze in dieser Situation meine Hörgeräte nicht

☐

Überhaupt nicht zufrieden

☐

Nicht sehr zufrieden

☐

Einigermaßen zufrieden

☐

Sehr zufrieden

☐

Äußerst zufrieden

## 13. Einer Vorstellung im Theater zuhören

*Wie oft sind Sie in dieser Situation?*

☐

Niemals \*

☐

Einige Male im Jahr

☐

Monatlich

☐

Wöchentlich

☐

Täglich

\* Falls niemals, gehe direkt zu nächsten Hörsituation

*Wie wichtig ist es für Sie, in dieser Situation gut zu hören?*

☐

Überhaupt nicht wichtig

☐

Nicht sehr wichtig

☐

Einigermaßen wichtig

☐

Sehr wichtig

☐

Äußerst wichtig

*Wie schwierig ist es für Sie in dieser Situation zu hören?*

☐

Überhaupt nicht schwierig

☐

Nicht sehr schwierig

☐

Einigermaßen schwierig

☐

Sehr schwierig

☐

Äußerst schwierig

*Wie zufrieden sind Sie in dieser Situation mit Ihren Hörgeräten?*

☐

Ich nutze in dieser Situation meine Hörgeräte nicht

☐

Überhaupt nicht zufrieden

☐

Nicht sehr zufrieden

☐

Einigermaßen zufrieden

☐

Sehr zufrieden

☐

Äußerst zufrieden

#### 14. Einem Livekonzert in einem lauten Publikum zuhören

*Wie oft sind Sie in dieser Situation?*

☐

Niemals \*

☐

Einige Male im Jahr

☐

Monatlich

☐

Wöchentlich

☐

Täglich

\* Falls niemals, gehe direkt zu nächsten Hörsituation

*Wie wichtig ist es für Sie, in dieser Situation gut zu hören?*

☐

Überhaupt nicht wichtig

☐

Nicht sehr wichtig

☐

Einigermaßen wichtig

☐

Sehr wichtig

☐

Äußerst wichtig

*Wie schwierig ist es für Sie in dieser Situation zu hören?*

☐

Überhaupt nicht schwierig

☐

Nicht sehr schwierig

☐

Einigermaßen schwierig

☐

Sehr schwierig

☐

Äußerst schwierig

*Wie zufrieden sind Sie in dieser Situation mit Ihren Hörgeräten?*

☐

Ich nutze in dieser Situation meine Hörgeräte nicht

☐

Überhaupt nicht zufrieden

☐

Nicht sehr zufrieden

☐

Einigermaßen zufrieden

☐

Sehr zufrieden

☐

Äußerst zufrieden

#### 15. Fernsehen in einem leisen Raum zu Hause

*Wie oft sind Sie in dieser Situation?*

☐

Niemals \*

☐

Einige Male im Jahr

☐

Monatlich

☐

Wöchentlich

☐

Täglich

\* Falls niemals, gehe direkt zu nächsten Hörsituation

*Wie wichtig ist es für Sie, in dieser Situation gut zu hören?*

☐

Überhaupt nicht wichtig

☐

Nicht sehr wichtig

☐

Einigermaßen wichtig

☐

Sehr wichtig

☐

Äußerst wichtig

*Wie schwierig ist es für Sie in dieser Situation zu hören?*

☐

Überhaupt nicht schwierig

☐

Nicht sehr schwierig

☐

Einigermaßen schwierig

☐

Sehr schwierig

☐

Äußerst schwierig

*Wie zufrieden sind Sie in dieser Situation mit Ihren Hörgeräten?*

☐

Ich nutze in dieser Situation meine Hörgeräte nicht

☐

Überhaupt nicht zufrieden

☐

Nicht sehr zufrieden

☐

Einigermaßen zufrieden

☐

Sehr zufrieden

☐

Äußerst zufrieden

## 16. Dem Radio oder einem Podcast zu Hause zuhören

*Wie oft sind Sie in dieser Situation?*

☐

Niemals \*

☐

Einige Male im Jahr

☐

Monatlich

☐

Wöchentlich

☐

Täglich

\* Falls niemals, gehe direkt zu nächsten Hörsituation

*Wie wichtig ist es für Sie, in dieser Situation gut zu hören?*

☐

Überhaupt nicht wichtig

☐

Nicht sehr wichtig

☐

Einigermaßen wichtig

☐

Sehr wichtig

☐

Äußerst wichtig

*Wie schwierig ist es für Sie in dieser Situation zu hören?*

☐

Überhaupt nicht schwierig

☐

Nicht sehr schwierig

☐

Einigermaßen schwierig

☐

Sehr schwierig

☐

Äußerst schwierig

*Wie zufrieden sind Sie in dieser Situation mit Ihren Hörgeräten?*

☐

Ich nutze in dieser Situation meine Hörgeräte nicht

☐

Überhaupt nicht zufrieden

☐

Nicht sehr zufrieden

☐

Einigermaßen zufrieden

☐

Sehr zufrieden

☐

Äußerst zufrieden

## 17. Musikhören zu Hause

*Wie oft sind Sie in dieser Situation?*

☐

Niemals \*

☐

Einige Male im Jahr

☐

Monatlich

☐

Wöchentlich

☐

Täglich

\* Falls niemals, gehe direkt zu nächsten Hörsituation

*Wie wichtig ist es für Sie, in dieser Situation gut zu hören?*

☐

Überhaupt nicht wichtig

☐

Nicht sehr wichtig

☐

Einigermaßen wichtig

☐

Sehr wichtig

☐

Äußerst wichtig

*Wie schwierig ist es für Sie in dieser Situation zu hören?*

☐

Überhaupt nicht schwierig

☐

Nicht sehr schwierig

☐

Einigermaßen schwierig

☐

Sehr schwierig

☐

Äußerst schwierig

*Wie zufrieden sind Sie in dieser Situation mit Ihren Hörgeräten?*

☐

Ich nutze in dieser Situation meine Hörgeräte nicht

☐

Überhaupt nicht zufrieden

☐

Nicht sehr zufrieden

☐

Einigermaßen zufrieden

☐

Sehr zufrieden

☐

Äußerst zufrieden

## 18. Dem Autoradio während der Fahrt zuhören

Wie oft sind Sie in dieser Situation?

☐

Niemals \*

☐

Einige Male im Jahr

☐

Monatlich

☐

Wöchentlich

☐

Täglich

\* Falls niemals, gehe direkt zu nächsten Hörsituation

Wie wichtig ist es für Sie, in dieser Situation gut zu hören?

☐

Überhaupt nicht wichtig

☐

Nicht sehr wichtig

☐

Einigermaßen wichtig

☐

Sehr wichtig

☐

Äußerst wichtig

Wie schwierig ist es für Sie in dieser Situation zu hören?

☐

Überhaupt nicht schwierig

☐

Nicht sehr schwierig

☐

Einigermaßen schwierig

☐

Sehr schwierig

☐

Äußerst schwierig

Wie zufrieden sind Sie in dieser Situation mit Ihren Hörgeräten?

☐

Ich nutze in dieser Situation meine Hörgeräte nicht

☐

Überhaupt nicht zufrieden

☐

Nicht sehr zufrieden

☐

Einigermaßen zufrieden

☐

Sehr zufrieden

☐

Äußerst zufrieden

## 19. Wahrnehmung relevanter Geräusche beim Staubsaugen

Wie oft sind Sie in dieser Situation?

☐

Niemals \*

☐

Einige Male im Jahr

☐

Monatlich

☐

Wöchentlich

☐

Täglich

\* Falls niemals, gehe direkt zu nächsten Hörsituation

Wie wichtig ist es für Sie, in dieser Situation gut zu hören?

☐

Überhaupt nicht wichtig

☐

Nicht sehr wichtig

☐

Einigermaßen wichtig

☐

Sehr wichtig

☐

Äußerst wichtig

Wie schwierig ist es für Sie in dieser Situation zu hören?

☐

Überhaupt nicht schwierig

☐

Nicht sehr schwierig

☐

Einigermaßen schwierig

☐

Sehr schwierig

☐

Äußerst schwierig

Wie zufrieden sind Sie in dieser Situation mit Ihren Hörgeräten?

☐

Ich nutze in dieser Situation meine Hörgeräte nicht

☐

Überhaupt nicht zufrieden

☐

Nicht sehr zufrieden

☐

Einigermaßen zufrieden

☐

Sehr zufrieden

☐

Äußerst zufrieden

## 20. Wahrnehmung relevanter Geräusche beim Spaziergang an einer belebten Straße

*Wie oft sind Sie in dieser Situation?*

☐

Niemals \*

☐

Einige Male im Jahr

☐

Monatlich

☐

Wöchentlich

☐

Täglich

\* Falls niemals, gehe direkt zu nächsten Hörsituation

*Wie wichtig ist es für Sie, in dieser Situation gut zu hören?*

☐

Überhaupt nicht wichtig

☐

Nicht sehr wichtig

☐

Einigermaßen wichtig

☐

Sehr wichtig

☐

Äußerst wichtig

*Wie schwierig ist es für Sie in dieser Situation zu hören?*

☐

Überhaupt nicht schwierig

☐

Nicht sehr schwierig

☐

Einigermaßen schwierig

☐

Sehr schwierig

☐

Äußerst schwierig

*Wie zufrieden sind Sie in dieser Situation mit Ihren Hörgeräten?*

☐

Ich nutze in dieser Situation meine Hörgeräte nicht

☐

Überhaupt nicht zufrieden

☐

Nicht sehr zufrieden

☐

Einigermaßen zufrieden

☐

Sehr zufrieden

☐

Äußerst zufrieden

## 21. Entspannen in einem leisen Raum zu Hause (z.B. beim Lesen oder Kreuzworträtsel lösen)

*Wie oft sind Sie in dieser Situation?*

☐

Niemals \*

☐

Einige Male im Jahr

☐

Monatlich

☐

Wöchentlich

☐

Täglich

\* Falls niemals, gehe direkt zu nächsten Hörsituation

*Wie wichtig ist es für Sie, in dieser Situation gut zu hören?*

☐

Überhaupt nicht wichtig

☐

Nicht sehr wichtig

☐

Einigermaßen wichtig

☐

Sehr wichtig

☐

Äußerst wichtig

*Wie schwierig ist es für Sie in dieser Situation zu hören?*

☐

Überhaupt nicht schwierig

☐

Nicht sehr schwierig

☐

Einigermaßen schwierig

☐

Sehr schwierig

☐

Äußerst schwierig

*Wie zufrieden sind Sie in dieser Situation mit Ihren Hörgeräten?*

☐

Ich nutze in dieser Situation meine Hörgeräte nicht

☐

Überhaupt nicht zufrieden

☐

Nicht sehr zufrieden

☐

Einigermaßen zufrieden

☐

Sehr zufrieden

☐

Äußerst zufrieden

## 22. In einem öffentlichen Verkehrsmittel oder als Beifahrer im Auto „nichts tun“ oder lesen

*Wie oft sind Sie in dieser Situation?*

☐

Niemals \*

☐

Einige Male im Jahr

☐

Monatlich

☐

Wöchentlich

☐

Täglich

\* Falls niemals, gehe direkt zu nächsten Hörsituation

*Wie wichtig ist es für Sie, in dieser Situation gut zu hören?*

☐

Überhaupt nicht wichtig

☐

Nicht sehr wichtig

☐

Einigermaßen wichtig

☐

Sehr wichtig

☐

Äußerst wichtig

*Wie schwierig ist es für Sie in dieser Situation zu hören?*

☐

Überhaupt nicht schwierig

☐

Nicht sehr schwierig

☐

Einigermaßen schwierig

☐

Sehr schwierig

☐

Äußerst schwierig

*Wie zufrieden sind Sie in dieser Situation mit Ihren Hörgeräten?*

☐

Ich nutze in dieser Situation meine Hörgeräte nicht

☐

Überhaupt nicht zufrieden

☐

Nicht sehr zufrieden

☐

Einigermaßen zufrieden

☐

Sehr zufrieden

☐

Äußerst zufrieden

## 23. Naturgeräusche hören

*Wie oft sind Sie in dieser Situation?*

☐

Niemals \*

☐

Einige Male im Jahr

☐

Monatlich

☐

Wöchentlich

☐

Täglich

\* Falls niemals, gehe direkt zu nächsten Hörsituation

*Wie wichtig ist es für Sie, in dieser Situation gut zu hören?*

☐

Überhaupt nicht wichtig

☐

Nicht sehr wichtig

☐

Einigermaßen wichtig

☐

Sehr wichtig

☐

Äußerst wichtig

*Wie schwierig ist es für Sie in dieser Situation zu hören?*

☐

Überhaupt nicht schwierig

☐

Nicht sehr schwierig

☐

Einigermaßen schwierig

☐

Sehr schwierig

☐

Äußerst schwierig

*Wie zufrieden sind Sie in dieser Situation mit Ihren Hörgeräten?*

☐

Ich nutze in dieser Situation meine Hörgeräte nicht

☐

Überhaupt nicht zufrieden

☐

Nicht sehr zufrieden

☐

Einigermaßen zufrieden

☐

Sehr zufrieden

☐

Äußerst zufrieden
