# Supplementary material
Source: publisher figshare collection journal article supplement (https://asha.figshare.com/articles/dataset/_/21514044)
Supplement: Supplementary file 1 [file 1 › S5_AJA-22-00079Lelic.pdf]

## Frågeformulär om Hörselrelaterad Livsstil HEARLI-Q

Syftet med detta frågeformulär är att förstå vilken typ av lyssningssituationer du möter i din vardag och i vilken utsträckning du har svårt att höra i dessa situationer. Svara så ärligt du kan baserat på dina erfarenheter.

### 1. Samtal med en person i en tyst miljö (t. ex. hemma eller på ett kontor)

*Hur ofta är du i denna situation?*

☐

Aldrig\*

☐

Några gånger om året

☐

Varje månad

☐

Varje vecka

☐

Dagligen

\*Om aldrig, gå till nästa lyssningssituation

*Hur viktigt är det för dig att höra bra i denna situation?*

☐

Inte alls viktigt

☐

Lite viktigt

☐

Ganska viktigt

☐

Mycket viktigt

☐

Oerhört viktigt

*Hur svårt är det för dig att höra/lyssna i denna situation?*

☐

Inte alls svårt

☐

Lite svårt

☐

Ganska svårt

☐

Mycket svårt

☐

Oerhört svårt

*Hur nöjd är du med dina hörapparater i denna situation?*

☐

Jag använder inte hörapparat i denna situation

☐

Inte alls nöjd

☐

Lite nöjd

☐

Ganska nöjd

☐

Mycket nöjd

☐

Oerhört nöjd

## 2. Samtal med en person i en bullrig miljö (t. ex. på en restaurang)

*Hur ofta är du i denna situation?*

☐

Aldrig\*

☐

Några gånger om året

☐

Varje månad

☐

Varje vecka

☐

Dagligen

\*Om aldrig, gå till nästa lyssningssituation

*Hur viktigt är det för dig att höra bra i denna situation?*

☐

Inte alls viktigt

☐

Lite viktigt

☐

Ganska viktigt

☐

Mycket viktigt

☐

Oerhört viktigt

*Hur svårt är det för dig att höra/lyssna i denna situation?*

☐

Inte alls svårt

☐

Lite svårt

☐

Ganska svårt

☐

Mycket svårt

☐

Oerhört svårt

*Hur nöjd är du med dina hörapparater i denna situation?*

☐ Jag använder inte hörapparat i denna situation

☐

Inte alls nöjd

☐

Lite nöjd

☐

Ganska nöjd

☐

Mycket nöjd

☐

Oerhört nöjd

## 3. Samtal med en person i ett fordon (t. ex. i en bil eller i kollektivtrafiken)

*Hur ofta är du i denna situation?*

☐

Aldrig\*

☐

Några gånger om året

☐

Varje månad

☐

Varje vecka

☐

Dagligen

\*Om aldrig, gå till nästa lyssningssituation

*Hur viktigt är det för dig att höra bra i denna situation?*

☐

Inte alls viktigt

☐

Lite viktigt

☐

Ganska viktigt

☐

Mycket viktigt

☐

Oerhört viktigt

*Hur svårt är det för dig att höra/lyssna i denna situation?*

☐

Inte alls svårt

☐

Lite svårt

☐

Ganska svårt

☐

Mycket svårt

☐

Oerhört svårt

*Hur nöjd är du med dina hörapparater i denna situation?*

☐ Jag använder inte hörapparat i denna situation

☐

Inte alls nöjd

☐

Lite nöjd

☐

Ganska nöjd

☐

Mycket nöjd

☐

Oerhört nöjd

#### 4. Samtal med ett barn i en tyst miljö (t. ex. hemma)

*Hur ofta är du i denna situation?*

☐

Aldrig\*

☐

Några gånger om året

☐

Varje månad

☐

Varje vecka

☐

Dagligen

\*Om aldrig, gå till nästa lyssningssituation

*Hur viktigt är det för dig att höra bra i denna situation?*

☐

Inte alls viktigt

☐

Lite viktigt

☐

Ganska viktigt

☐

Mycket viktigt

☐

Oerhört viktigt

*Hur svårt är det för dig att höra/lyssna i denna situation?*

☐

Inte alls svårt

☐

Lite svårt

☐

Ganska svårt

☐

Mycket svårt

☐

Oerhört svårt

*Hur nöjd är du med dina hörapparater i denna situation?*

☐

Jag använder inte hörapparat i denna situation

☐

Inte alls nöjd

☐

Lite nöjd

☐

Ganska nöjd

☐

Mycket nöjd

☐

Oerhört nöjd

#### 5. Samtal med ett barn i en bullrig miljö (t. ex. på en förskola)

*Hur ofta är du i denna situation?*

☐

Aldrig\*

☐

Några gånger om året

☐

Varje månad

☐

Varje vecka

☐

Dagligen

\*Om aldrig, gå till nästa lyssningssituation

*Hur viktigt är det för dig att höra bra i denna situation?*

☐

Inte alls viktigt

☐

Lite viktigt

☐

Ganska viktigt

☐

Mycket viktigt

☐

Oerhört viktigt

*Hur svårt är det för dig att höra/lyssna i denna situation?*

☐

Inte alls svårt

☐

Lite svårt

☐

Ganska svårt

☐

Mycket svårt

☐

Oerhört svårt

*Hur nöjd är du med dina hörapparater i denna situation?*

☐

Jag använder inte hörapparat i denna situation

☐

Inte alls nöjd

☐

Lite nöjd

☐

Ganska nöjd

☐

Mycket nöjd

☐

Oerhört nöjd

## 6. Samtal med en person på en plats där det ekar mycket (t. ex. i en kyrka eller i en stationsbyggnad)

*Hur ofta är du i denna situation?*

☐

Aldrig\*

☐

Några gånger om året

☐

Varje månad

☐

Varje vecka

☐

Dagligen

\*Om aldrig, gå till nästa lyssningssituation

*Hur viktigt är det för dig att höra bra i denna situation?*

☐

Inte alls viktigt

☐

Lite viktigt

☐

Ganska viktigt

☐

Mycket viktigt

☐

Oerhört viktigt

*Hur svårt är det för dig att höra/lyssna i denna situation?*

☐

Inte alls svårt

☐

Lite svårt

☐

Ganska svårt

☐

Mycket svårt

☐

Oerhört svårt

*Hur nöjd är du med dina hörapparater i denna situation?*

☐

Jag använder inte hörapparat i denna situation

☐

Inte alls nöjd

☐

Lite nöjd

☐

Ganska nöjd

☐

Mycket nöjd

☐

Oerhört nöjd

## 7. Samtal med flera personer i en tyst miljö (t. ex. hemma eller på ett kontor)

*Hur ofta är du i denna situation?*

☐

Aldrig\*

☐

Några gånger om året

☐

Varje månad

☐

Varje vecka

☐

Dagligen

\*Om aldrig, gå till nästa lyssningssituation

*Hur viktigt är det för dig att höra bra i denna situation?*

☐

Inte alls viktigt

☐

Lite viktigt

☐

Ganska viktigt

☐

Mycket viktigt

☐

Oerhört viktigt

*Hur svårt är det för dig att höra/lyssna i denna situation?*

☐

Inte alls svårt

☐

Lite svårt

☐

Ganska svårt

☐

Mycket svårt

☐

Oerhört svårt

*Hur nöjd är du med dina hörapparater i denna situation?*

☐

Jag använder inte hörapparat i denna situation

☐

Inte alls nöjd

☐

Lite nöjd

☐

Ganska nöjd

☐

Mycket nöjd

☐

Oerhört nöjd

## 8. Samtal med flera personer i en bullrig miljö (t.ex. på en restaurang)

*Hur ofta är du i denna situation?*

☐

Aldrig\*

☐

Några gånger om året

☐

Varje månad

☐

Varje vecka

☐

Dagligen

\*Om aldrig, gå till nästa lyssningssituation

*Hur viktigt är det för dig att höra bra i denna situation?*

☐

Inte alls viktigt

☐

Lite viktigt

☐

Ganska viktigt

☐

Mycket viktigt

☐

Oerhört viktigt

*Hur svårt är det för dig att höra/lyssna i denna situation?*

☐

Inte alls svårt

☐

Lite svårt

☐

Ganska svårt

☐

Mycket svårt

☐

Oerhört svårt

*Hur nöjd är du med dina hörapparater i denna situation?*

☐

Jag använder inte hörapparat i denna situation

☐

Inte alls nöjd

☐

Lite nöjd

☐

Ganska nöjd

☐

Mycket nöjd

☐

Oerhört nöjd

## 9. Samtal med flera personer i ett fordon (t.ex. i en bil eller i kollektivtrafiken)

*Hur ofta är du i denna situation?*

☐

Aldrig\*

☐

Några gånger om året

☐

Varje månad

☐

Varje vecka

☐

Dagligen

\*Om aldrig, gå till nästa lyssningssituation

*Hur viktigt är det för dig att höra bra i denna situation?*

☐

Inte alls viktigt

☐

Lite viktigt

☐

Ganska viktigt

☐

Mycket viktigt

☐

Oerhört viktigt

*Hur svårt är det för dig att höra/lyssna i denna situation?*

☐

Inte alls svårt

☐

Lite svårt

☐

Ganska svårt

☐

Mycket svårt

☐

Oerhört svårt

*Hur nöjd är du med dina hörapparater i denna situation?*

☐

Jag använder inte hörapparat i denna situation

☐

Inte alls nöjd

☐

Lite nöjd

☐

Ganska nöjd

☐

Mycket nöjd

☐

Oerhört nöjd

**10. Samtal med en eller flera personer när du använder telefon eller annan kommunikationsutrustning (t.ex. dator eller mobiltelefon) i ett tyst rum hemma**

*Hur ofta är du i denna situation?*

☐

Aldrig\*

☐

Några gånger om året

☐

Varje månad

☐

Varje vecka

☐

Dagligen

\*Om aldrig, gå till nästa lyssningssituation

*Hur viktigt är det för dig att höra bra i denna situation?*

☐

Inte alls viktigt

☐

Lite viktigt

☐

Ganska viktigt

☐

Mycket viktigt

☐

Oerhört viktigt

*Hur svårt är det för dig att höra/lyssna i denna situation?*

☐

Inte alls svårt

☐

Lite svårt

☐

Ganska svårt

☐

Mycket svårt

☐

Oerhört svårt

*Hur nöjd är du med dina hörapparater i denna situation?*

☐

Jag använder inte hörapparat i denna situation

☐

Inte alls nöjd

☐

Lite nöjd

☐

Ganska nöjd

☐

Mycket nöjd

☐

Oerhört nöjd

**11. Samtal med en person när du använder mobiltelefon vid en trafikerad gata**

*Hur ofta är du i denna situation?*

☐

Aldrig\*

☐

Några gånger om året

☐

Varje månad

☐

Varje vecka

☐

Dagligen

\*Om aldrig, gå till nästa lyssningssituation

*Hur viktigt är det för dig att höra bra i denna situation?*

☐

Inte alls viktigt

☐

Lite viktigt

☐

Ganska viktigt

☐

Mycket viktigt

☐

Oerhört viktigt

*Hur svårt är det för dig att höra/lyssna i denna situation?*

☐

Inte alls svårt

☐

Lite svårt

☐

Ganska svårt

☐

Mycket svårt

☐

Oerhört svårt

*Hur nöjd är du med dina hörapparater i denna situation?*

☐

Jag använder inte hörapparat i denna situation

☐

Inte alls nöjd

☐

Lite nöjd

☐

Ganska nöjd

☐

Mycket nöjd

☐

Oerhört nöjd

## 12. Lyssna på ett föredrag

*Hur ofta är du i denna situation?*

☐

Aldrig\*

☐

Några gånger om året

☐

Varje månad

☐

Varje vecka

☐

Dagligen

\*Om aldrig, gå till nästa lyssningssituation

*Hur viktigt är det för dig att höra bra i denna situation?*

☐

Inte alls viktigt

☐

Lite viktigt

☐

Ganska viktigt

☐

Mycket viktigt

☐

Oerhört viktigt

*Hur svårt är det för dig att höra/lyssna i denna situation?*

☐

Inte alls svårt

☐

Lite svårt

☐

Ganska svårt

☐

Mycket svårt

☐

Oerhört svårt

*Hur nöjd är du med dina hörapparater i denna situation?*

☐

Jag använder inte hörapparat i denna situation

☐

Inte alls nöjd

☐

Lite nöjd

☐

Ganska nöjd

☐

Mycket nöjd

☐

Oerhört nöjd

## 13. Lyssna på en föreställning på en teater

*Hur ofta är du i denna situation?*

☐

Aldrig\*

☐

Några gånger om året

☐

Varje månad

☐

Varje vecka

☐

Dagligen

\*Om aldrig, gå till nästa lyssningssituation

*Hur viktigt är det för dig att höra bra i denna situation?*

☐

Inte alls viktigt

☐

Lite viktigt

☐

Ganska viktigt

☐

Mycket viktigt

☐

Oerhört viktigt

*Hur svårt är det för dig att höra/lyssna i denna situation?*

☐

Inte alls svårt

☐

Lite svårt

☐

Ganska svårt

☐

Mycket svårt

☐

Oerhört svårt

*Hur nöjd är du med dina hörapparater i denna situation?*

☐

Jag använder inte hörapparat i denna situation

☐

Inte alls nöjd

☐

Lite nöjd

☐

Ganska nöjd

☐

Mycket nöjd

☐

Oerhört nöjd

#### 14. Lyssna på en live-konsert i en stimmig grupp med människor

*Hur ofta är du i denna situation?*

☐

Aldrig\*

☐

Några gånger om året

☐

Varje månad

☐

Varje vecka

☐

Dagligen

\*Om aldrig, gå till nästa lyssningssituation

*Hur viktigt är det för dig att höra bra i denna situation?*

☐

Inte alls viktigt

☐

Lite viktigt

☐

Ganska viktigt

☐

Mycket viktigt

☐

Oerhört viktigt

*Hur svårt är det för dig att höra/lyssna i denna situation?*

☐

Inte alls svårt

☐

Lite svårt

☐

Ganska svårt

☐

Mycket svårt

☐

Oerhört svårt

*Hur nöjd är du med dina hörapparater i denna situation?*

☐

Jag använder inte hörapparat i denna situation

☐

Inte alls nöjd

☐

Lite nöjd

☐

Ganska nöjd

☐

Mycket nöjd

☐

Oerhört nöjd

#### 15. Lyssna på TV i ett tyst rum hemma

*Hur ofta är du i denna situation?*

☐

Aldrig\*

☐

Några gånger om året

☐

Varje månad

☐

Varje vecka

☐

Dagligen

\*Om aldrig, gå till nästa lyssningssituation

*Hur viktigt är det för dig att höra bra i denna situation?*

☐

Inte alls viktigt

☐

Lite viktigt

☐

Ganska viktigt

☐

Mycket viktigt

☐

Oerhört viktigt

*Hur svårt är det för dig att höra/lyssna i denna situation?*

☐

Inte alls svårt

☐

Lite svårt

☐

Ganska svårt

☐

Mycket svårt

☐

Oerhört svårt

*Hur nöjd är du med dina hörapparater i denna situation?*

☐

Jag använder inte hörapparat i denna situation

☐

Inte alls nöjd

☐

Lite nöjd

☐

Ganska nöjd

☐

Mycket nöjd

☐

Oerhört nöjd

## 16. Lyssna på radio eller en podcast i ett tyst rum hemma

*Hur ofta är du i denna situation?*

☐

Aldrig\*

☐

Några gånger om året

☐

Varje månad

☐

Varje vecka

☐

Dagligen

\*Om aldrig, gå till nästa lyssningssituation

*Hur viktigt är det för dig att höra bra i denna situation?*

☐

Inte alls viktigt

☐

Lite viktigt

☐

Ganska viktigt

☐

Mycket viktigt

☐

Oerhört viktigt

*Hur svårt är det för dig att höra/lyssna i denna situation?*

☐

Inte alls svårt

☐

Lite svårt

☐

Ganska svårt

☐

Mycket svårt

☐

Oerhört svårt

*Hur nöjd är du med dina hörapparater i denna situation?*

☐

Jag använder inte hörapparat i denna situation

☐

Inte alls nöjd

☐

Lite nöjd

☐

Ganska nöjd

☐

Mycket nöjd

☐

Oerhört nöjd

## 17. Lyssna på musik hemma

*Hur ofta är du i denna situation?*

☐

Aldrig\*

☐

Några gånger om året

☐

Varje månad

☐

Varje vecka

☐

Dagligen

\*Om aldrig, gå till nästa lyssningssituation

*Hur viktigt är det för dig att höra bra i denna situation?*

☐

Inte alls viktigt

☐

Lite viktigt

☐

Ganska viktigt

☐

Mycket viktigt

☐

Oerhört viktigt

*Hur svårt är det för dig att höra/lyssna i denna situation?*

☐

Inte alls svårt

☐

Lite svårt

☐

Ganska svårt

☐

Mycket svårt

☐

Oerhört svårt

*Hur nöjd är du med dina hörapparater i denna situation?*

☐

Jag använder inte hörapparat i denna situation

☐

Inte alls nöjd

☐

Lite nöjd

☐

Ganska nöjd

☐

Mycket nöjd

☐

Oerhört nöjd

## 18. Lyssna på bilstereon i en bil under färd

*Hur ofta är du i denna situation?*

☐

Aldrig\*

☐

Några gånger om året

☐

Varje månad

☐

Varje vecka

☐

Dagligen

\*Om aldrig, gå till nästa lyssningssituation

*Hur viktigt är det för dig att höra bra i denna situation?*

☐

Inte alls viktigt

☐

Lite viktigt

☐

Ganska viktigt

☐

Mycket viktigt

☐

Oerhört viktigt

*Hur svårt är det för dig att höra/lyssna i denna situation?*

☐

Inte alls svårt

☐

Lite svårt

☐

Ganska svårt

☐

Mycket svårt

☐

Oerhört svårt

*Hur nöjd är du med dina hörapparater i denna situation?*

☐

Jag använder inte hörapparat i denna situation

☐

Inte alls nöjd

☐

Lite nöjd

☐

Ganska nöjd

☐

Mycket nöjd

☐

Oerhört nöjd

## 19. Vara medveten om ljud vid dammsugning

*Hur ofta är du i denna situation?*

☐

Aldrig\*

☐

Några gånger om året

☐

Varje månad

☐

Varje vecka

☐

Dagligen

\*Om aldrig, gå till nästa lyssningssituation

*Hur viktigt är det för dig att höra bra i denna situation?*

☐

Inte alls viktigt

☐

Lite viktigt

☐

Ganska viktigt

☐

Mycket viktigt

☐

Oerhört viktigt

*Hur svårt är det för dig att höra/lyssna i denna situation?*

☐

Inte alls svårt

☐

Lite svårt

☐

Ganska svårt

☐

Mycket svårt

☐

Oerhört svårt

*Hur nöjd är du med dina hörapparater i denna situation?*

☐

Jag använder inte hörapparat i denna situation

☐

Inte alls nöjd

☐

Lite nöjd

☐

Ganska nöjd

☐

Mycket nöjd

☐

Oerhört nöjd

## 20. Vara uppmärksam på trafikljud under en promenad vid en trafikerad gata

*Hur ofta är du i denna situation?*

☐

Aldrig\*

☐

Några gånger om året

☐

Varje månad

☐

Varje vecka

☐

Dagligen

\*Om aldrig, gå till nästa lyssningssituation

*Hur viktigt är det för dig att höra bra i denna situation?*

☐

Inte alls viktigt

☐

Lite viktigt

☐

Ganska viktigt

☐

Mycket viktigt

☐

Oerhört viktigt

*Hur svårt är det för dig att höra/lyssna i denna situation?*

☐

Inte alls svårt

☐

Lite svårt

☐

Ganska svårt

☐

Mycket svårt

☐

Oerhört svårt

*Hur nöjd är du med dina hörapparater i denna situation?*

☐

Jag använder inte hörapparat i denna situation

☐

Inte alls nöjd

☐

Lite nöjd

☐

Ganska nöjd

☐

Mycket nöjd

☐

Oerhört nöjd

## 21. Koppla av i ett tyst rum hemma (t. ex. när man läser en bok eller löser ett korsord)

*Hur ofta är du i denna situation?*

☐

Aldrig\*

☐

Några gånger om året

☐

Varje månad

☐

Varje vecka

☐

Dagligen

\*Om aldrig, gå till nästa lyssningssituation

*Hur viktigt är det för dig att höra bra i denna situation?*

☐

Inte alls viktigt

☐

Lite viktigt

☐

Ganska viktigt

☐

Mycket viktigt

☐

Oerhört viktigt

*Hur svårt är det för dig att höra/lyssna i denna situation?*

☐

Inte alls svårt

☐

Lite svårt

☐

Ganska svårt

☐

Mycket svårt

☐

Oerhört svårt

*Hur nöjd är du med dina hörapparater i denna situation?*

☐

Jag använder inte hörapparat i denna situation

☐

Inte alls nöjd

☐

Lite nöjd

☐

Ganska nöjd

☐

Mycket nöjd

☐

Oerhört nöjd

## 22. Vara passagerare i en bil eller i kollektivtrafiken utan att man gör något särskilt eller läser

*Hur ofta är du i denna situation?*

☐

Aldrig\*

☐

Några gånger om året

☐

Varje månad

☐

Varje vecka

☐

Dagligen

\*Om aldrig, gå till nästa lyssningssituation

*Hur viktigt är det för dig att höra bra i denna situation?*

☐

Inte alls viktigt

☐

Lite viktigt

☐

Ganska viktigt

☐

Mycket viktigt

☐

Oerhört viktigt

*Hur svårt är det för dig att höra/lyssna i denna situation?*

☐

Inte alls svårt

☐

Lite svårt

☐

Ganska svårt

☐

Mycket svårt

☐

Oerhört svårt

*Hur nöjd är du med dina hörapparater i denna situation?*

☐

Jag använder inte hörapparat i denna situation

☐

Inte alls nöjd

☐

Lite nöjd

☐

Ganska nöjd

☐

Mycket nöjd

☐

Oerhört nöjd

## 23. Höra naturljud

*Hur ofta är du i denna situation?*

☐

Aldrig\*

☐

Några gånger om året

☐

Varje månad

☐

Varje vecka

☐

Dagligen

\*Om aldrig, gå till nästa lyssningssituation

*Hur viktigt är det för dig att höra bra i denna situation?*

☐

Inte alls viktigt

☐

Lite viktigt

☐

Ganska viktigt

☐

Mycket viktigt

☐

Oerhört viktigt

*Hur svårt är det för dig att höra/lyssna i denna situation?*

☐

Inte alls svårt

☐

Lite svårt

☐

Ganska svårt

☐

Mycket svårt

☐

Oerhört svårt

*Hur nöjd är du med dina hörapparater i denna situation?*

☐

Jag använder inte hörapparat i denna situation

☐

Inte alls nöjd

☐

Lite nöjd

☐

Ganska nöjd

☐

Mycket nöjd

☐

Oerhört nöjd
