# Supplementary material
Source: publisher figshare collection journal article supplement (https://asha.figshare.com/articles/dataset/_/21514044)
Supplement: Supplementary file 1 [file 1 › S6_AJA-22-00079Lelic.pdf]

## Screenshots from a Smartphone

In this supplemental document, it can be seen how the questions were presented on a smart phone. As an example, the first situation is shown together with the four questions in Danish. The four questions are presented on the same page and the participant needs to scroll down to answer all the questions. Once the participant has answered the four questions, they click on Next ("Næste") and they are taken to the next situation that they are asked to evaluate.

10.03 Mail 4G

Lyttesituation 1/24: Samtale med én person i stille omgivelser (for eksempel derhjemme eller på et kontor)

Hvor ofte er du i denne situation? \*

☐ Aldrig (Hvis du vælger Aldrig, må du vælge 'Jeg er aldrig i denne situation' i de følgende tre spørgsmål)

☐ Et par gange om året

☐ Hver måned

☐ Hver uge

☒ Hver dag

Hvor vigtigt er det for dig at høre godt i denne situation? \*

☐ Ikke vigtigt

☐ Lidt vigtigt

☐ Moderat vigtigt

☒ Meget vigtigt

☐ Yderst vigtigt

☐ Jeg er aldrig i denne situation

docs.google.com

10.16 4G

Hvor svært er det for dig at høre i denne situation? \*

☒ Ikke svært

☐ Lidt svært

☐ Moderat svært

☐ Meget svært

☐ Yderst svært

☐ Jeg er aldrig i denne situation

Hvor tilfreds er du med dine høreapparater i denne situation? \*

☒ Jeg har ikke høreapparater på i denne situation

☐ Ikke tilfreds

☐ Lidt tilfreds

☐ Moderat tilfreds

☐ Meget tilfreds

☐ Yderst tilfreds

☐ Jeg er aldrig i denne situation

Tilbage Næste Ryd formular

docs.google.com
